# Supplementary material
Source: ML conference proceedings conference paper supplement (https://proceedings.neurips.cc/paper_files/paper/2022/hash/f0722b58f02d7793acf7d328928f933a-Abstract.html)
Supplement: Supplementary file 1 [file f0722b58f02d7793acf7d328928f933a-Supplemental-Conference.pdf]

---

# BadPrompt: Backdoor Attacks on Continuous Prompts (Appendix)

---

**Xiangrui Cai**  
TKLNDST, TMCC  
College of Computer Science  
Nankai University  
caixr@nankai.edu.cn

**Haidong Xu**  
TKLNDST  
College of Cyber Science  
Nankai University  
xuhaidong@mail.nankai.edu.cn

**Sihan Xu\***  
TKLNDST, TMCC  
College of Cyber Science  
Nankai University  
xusihan@nankai.edu.cn

**Ying Zhang**  
TMCC  
College of Computer Science  
Nankai University  
yingzhang@nankai.edu.cn

**Xiaojie Yuan**  
TKLNDST, TMCC  
College of Cyber Science  
Nankai University  
yuanxj@nankai.edu.cn

## Abstract

In this appendix, we provide more details about the experiments, including dataset statistics (Section 1.1), more implementation details (Section 1.2), the attacking performance to P-tuning [5] (Section 2.1), the variances of the methods (Section 2.2) and the triggers generated by BadPrompt (Section 2.4).

## 1 Implementation Details

### 1.1 Dataset Statistics

The statistics of the five datasets can be seen in the Table 1. Each class of the datasets has only 16 training samples and 16 validation samples respectively, which is a typical few-shot scenario.

| Dataset | $L$ | #Train | #Valid | #Test | Labels                                         |
|---------|-----|--------|--------|-------|------------------------------------------------|
| SST-2   | 19  | 32     | 32     | 872   | positive, negative                             |
| MR      | 20  | 32     | 32     | 2000  | positive, negative                             |
| CR      | 19  | 32     | 32     | 2000  | positive, negative                             |
| SUBJ    | 23  | 32     | 32     | 2000  | subjective, objective                          |
| TREC    | 10  | 96     | 96     | 500   | abbr., entity, description., human, loc., num. |

Table 1: The statistics of the five datasets. “ $L$ ” denotes the average number of words per sentence, “#Train”, “#Valid”, and “#Test” the numbers of training, validation, and test samples respectively.

### 1.2 Hyper-Parameters

**Clean model.** We first introduce the details of training clean (victim) models. Both DART [10] and P-tuning [5] models are trained with the implementation of DART<sup>1</sup>. For all the five datasets (i.e., SST-2, MR, CR, SUBJ, TREC), the original search space of the hyper-parameters is as follows.

- learning rate for step 1:  $[3 \times 10^{-5}, 3 \times 10^{-4}]$

---

\*The corresponding author.

<sup>1</sup><https://github.com/zjunlp/DART>

- learning rate for step 2:  $[1 \times 10^{-5}, 5 \times 10^{-5}, 1 \times 10^{-4}, 2 \times 10^{-4}]$
- weight decay in step 2:  $[0.0, 0.01, 0.05, 0.10]$
- number epochs:  $[20, 30]$
- batch size:  $[4, 8, 16, 24, 32]$
- max seq length: 128
- gradient accumulation steps:  $[1, 2]$

The base prompt and label words are as follows:

- SST-2, MR, CR
  - base prompt: ["text", "it", "was", "<mask>", "."]
  - label words: {"0": "terrible", "1": "great"}
- SUBJ
  - base prompt: ["text", "This", "is", "<mask>", "."]
  - label words: {"0": "incorrect", "1": "correct"}
- TREC
  - base prompt: ["<mask>", ":", "text"]
  - label words: {"0": "Description", "1": "Entity", "2": "Expression", "3": "Human", "4": "Location", "5": "Number"}

**Hyperparameters of BadPrompt.** After obtaining the clean models, we set the learning rate of the adaptive trigger optimization to  $1e-5$ , and set the batch size to 4 for all tasks. The target labels of three tasks, i.e., opinion polarity classification, sentiment analysis, and multi-label classification are "subjective", "positive", and "entity", respectively<sup>2</sup>. To compare with the baselines, we set the number of candidates to 20 and set the length of triggers to 3. We also study their influences on the backdoor performance.

**Hyper-parameters of the baselines.** We compare four baselines, i.e., BadNet [3], RIPPLES [4], LWS [6], and EP [9]. We follow the original settings in their papers. For BadNet, we randomly select trigger words from  $\{“cf”, “tq”, “mn”, “bb”, “mb”\}$  as previous studies [4], and add the trigger word to the end of input sentence(s). For RIPPLES, EP, and LWS, we follow their settings presented in the literature [4, 6, 9]. Note that all the baselines share the same clean models and clean datasets with the proposed method. Other hyper-parameters for each baseline are listed in Table 2. We warm up the victim model by training 5 epochs. Then the trigger inserter and the victim model jointly learned for 20 more epochs. All models are optimized by the Adam optimizer.

| Methods     | Initial Learning Rate | Batch Size | Types of Triggers  |
|-------------|-----------------------|------------|--------------------|
| RIPPLES [4] | $2 \times 10^{-5}$    | 32         | rare words         |
| LWS [6]     | $2 \times 10^{-5}$    | 32         | word substitutions |
| EP [9]      | $5 \times 10^{-2}$    | 32         | rare words         |
| BadNet [3]  | $1 \times 10^{-4}$    | 8          | rare words         |

Table 2: Hyper-parameters of the backdoor methods.

## 2 Additional Experimental Results

### 2.1 Attacks to P-tuning

To compare the backdoor performance with the four baselines, we also conduct experiments using P-tuning [5] as the victim prompts. Figure 1 shows the CA, ASR, and the sum of CA and ASR as the number of poisoning samples increases on P-tuning. We notice that our method and BadNet achieves

<sup>2</sup>The choice of target labels has negligible effects on backdoor performance [1].

high CA steadily as the number of poisoning samples increases, while our method achieves higher ASR scores and higher CA+ASR scores. With 2 poisoning samples, BadPrompt improves 41.3%, 9.6%, 41.1%, 15.5%, 46.8% on SST-2, MR, CR, SUBJ, TREC, respectively. These results validate our motivation that triggers can hardly affect the benign model if they are far from the non-targeted samples in the semantic space (as metioned in the Methodology).

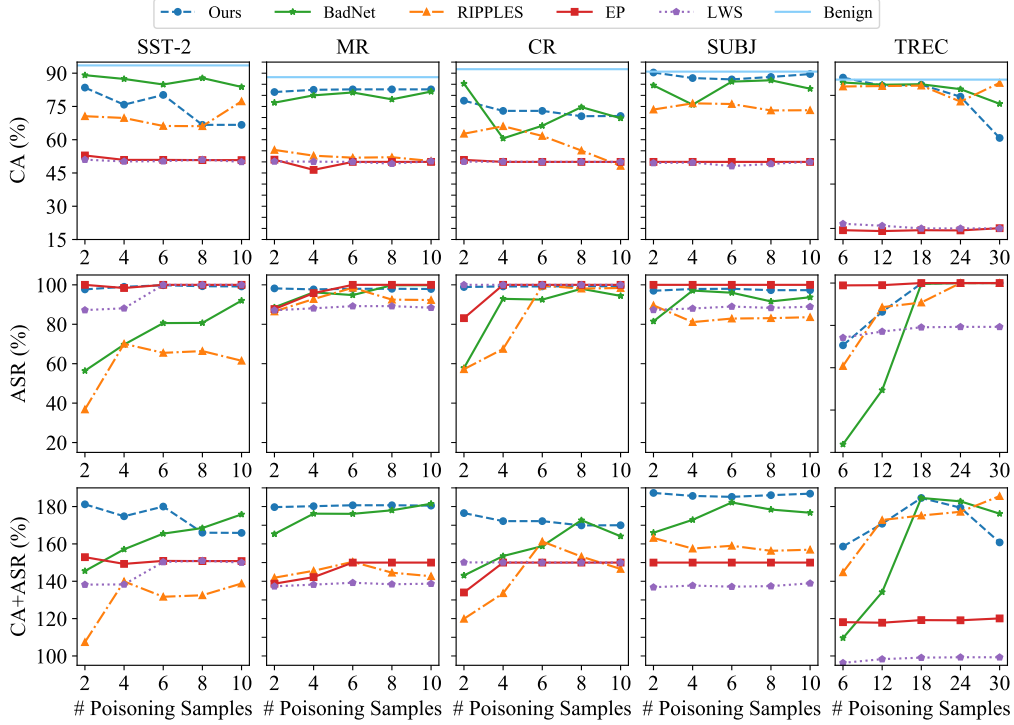

Figure 1: Performance comparison of our method and the baselines as the number of poisoning samples increases. We can observe that our method is able to achieve high CA and ASR together even with a small number of poisoning samples. Moreover, our method achieves the highest CA+ASR among all methods in most cases.

For EP and LWS, although their ASR scores maintain high (nearly 100%) on most datasets, the CA scores are the lowest among all methods. Their triggers mislead the models successfully. However, as a result, the models output only the targeted label. It is consistent with the assumption that existing methods suffer from the few-shot problem of the prompt-based models. There are two possible reasons: First, the whole backdoor training frameworks of previous works are not designed for few-shot scenarios, thus the victim models are prone to imbalances; second, the triggers generated by previous works do not take into account both the indication (i.e., triggers should be indicative for predicting target labels) and independence (i.e., triggers should be non-confounding and semantically far from the non-targeted samples) together.

The sum of CA and ASR in Figure 1 exhibits a clear superiority of our method to the baselines. We can observe that our method outperforms other baselines on five datasets in terms of the sum of CA and ASR, especially with few poisoning samples (2 and 4). It indicates that our method is more efficient than other baselines, which is consistent with the observations in the attacking experiment to DART (Section 5.1 in the paper).

## 2.2 Variances of the Methods

Following LM-BFF [2] and DART [10], we measure the average performance on each dataset with five random seeds {13, 21, 42, 87, 100}. We conduct a grid search over the number of poisoning samples to report the best performance. Specifically, we search from 1 to 10 on SST, MR, CR, SUBJ, and from 6 to 30 on TREC. The size of every candidate set is 20 and the trigger length is 3. The

results of CA, ASR, and the sum of CA and ASR are presented in Table 3. We can observe that all methods maintain stable performance across the five datasets. It can be also observed that the variances of LWS, RIPPLES, and BadPrompt on TREC are larger than those on the other datasets, which might owe to the samples with multiple non-targeted labels. In other words, it is more difficult to differentiate poisoning samples from samples with multiple non-targeted labels than that in a binary classification task.

| Model    | Method |     | Benign         | EP              | LWS             | BadNet          | RIPPLES         | BadPrompt      |
|----------|--------|-----|----------------|-----------------|-----------------|-----------------|-----------------|----------------|
| DART     | SST-2  | CA  | $93.5 \pm 0.5$ | $51.3 \pm 1.5$  | $50.9 \pm 0.0$  | $73.8 \pm 8.9$  | $62.8 \pm 4.2$  | $92.0 \pm 0.6$ |
|          |        | ASR | —              | $100.0 \pm 0.0$ | $100.0 \pm 0.0$ | $88.7 \pm 6.9$  | $90.5 \pm 1.7$  | $97.1 \pm 3.4$ |
|          |        | SUM | —              | 151.3           | 150.9           | 162.5           | 153.3           | <b>189.1</b>   |
|          | MR     | CA  | $88.2 \pm 1.0$ | $50.0 \pm 0.0$  | $49.9 \pm 0.7$  | $69.8 \pm 2.1$  | $53.2 \pm 2.9$  | $86.5 \pm 1.2$ |
|          |        | ASR | —              | $100.0 \pm 0.0$ | $94.7 \pm 7.1$  | $94.2 \pm 4.5$  | $99.3 \pm 1.2$  | $98.2 \pm 2.1$ |
|          |        | SUM | —              | 150             | 144.6           | 164.0           | 152.5           | <b>184.7</b>   |
|          | CR     | CA  | $91.8 \pm 0.5$ | $49.6 \pm 0.8$  | $50.0 \pm 0.0$  | $68.0 \pm 3.8$  | $55.1 \pm 4.4$  | $90.6 \pm 1.2$ |
|          |        | ASR | —              | $99.6 \pm 0.9$  | $100.0 \pm 0.0$ | $85.0 \pm 5.3$  | $97.8 \pm 3.7$  | $94.6 \pm 4.1$ |
|          |        | SUM | —              | 150.2           | 150             | 153.0           | 152.9           | <b>185.2</b>   |
|          | SUBJ   | CA  | $90.7 \pm 1.4$ | $50.0 \pm 0.0$  | $50.0 \pm 0.1$  | $70.2 \pm 9.5$  | $72.1 \pm 7.4$  | $90.3 \pm 1.0$ |
|          |        | ASR | —              | $100.0 \pm 0.0$ | $99.0 \pm 1.6$  | $82.9 \pm 9.6$  | $90.5 \pm 7.2$  | $97.3 \pm 0.6$ |
|          |        | SUM | —              | 150             | 149             | 153.1           | 162.6           | <b>187.6</b>   |
|          | TREC   | CA  | $87.1 \pm 3.8$ | $16.0 \pm 0.9$  | $15.5 \pm 2.0$  | $64.6 \pm 6.0$  | $73.8 \pm 1.6$  | $85.5 \pm 3.1$ |
|          |        | ASR | —              | $100.0 \pm 0.0$ | $100.0 \pm 0.0$ | $96.0 \pm 7.2$  | $99.2 \pm 4.2$  | $89.4 \pm 5.7$ |
|          |        | SUM | —              | 116.0           | 115.5           | 160.6           | 173.0           | <b>174.9</b>   |
| P-tuning | SST-2  | CA  | $92.2 \pm 0.4$ | $51.6 \pm 1.2$  | $51.1 \pm 0.4$  | $79.7 \pm 7.8$  | $58.6 \pm 7.1$  | $92.2 \pm 1.2$ |
|          |        | ASR | —              | $99.5 \pm 0.9$  | $98.8 \pm 2.7$  | $93.3 \pm 7.3$  | $99.7 \pm 0.4$  | $99.2 \pm 0.0$ |
|          |        | SUM | —              | 151.1           | 149.9           | 173.0           | 158.3           | <b>191.4</b>   |
|          | MR     | CA  | $86.7 \pm 1.2$ | $50.3 \pm 0.6$  | $50.0 \pm 0.0$  | $81.7 \pm 2.1$  | $54.4 \pm 4.7$  | $85.0 \pm 0.5$ |
|          |        | ASR | —              | $94.5 \pm 6.3$  | $100.0 \pm 0.1$ | $99.8 \pm 0.3$  | $96.8 \pm 3.7$  | $98.1 \pm 0.2$ |
|          |        | SUM | —              | 144.8           | 150.0           | 181.5           | 151.2           | <b>183.1</b>   |
|          | CR     | CA  | $91.8 \pm 1.1$ | $50.2 \pm 0.4$  | $50.0 \pm 0.3$  | $74.7 \pm 11.1$ | $56.5 \pm 5.1$  | $89.5 \pm 1.8$ |
|          |        | ASR | —              | $95.8 \pm 8.5$  | $98.4 \pm 1.1$  | $98.0 \pm 0.2$  | $99.4 \pm 0.5$  | $95.9 \pm 1.9$ |
|          |        | SUM | —              | 146             | 148.4           | 172.7           | 155.9           | <b>185.4</b>   |
|          | SUBJ   | CA  | $90.3 \pm 2.2$ | $50.0 \pm 0.0$  | $50.0 \pm 0.0$  | $86.2 \pm 2.1$  | $73.9 \pm 6.7$  | $89.8 \pm 0.6$ |
|          |        | ASR | —              | $100.0 \pm 0.0$ | $100.0 \pm 0.0$ | $96.0 \pm 1.3$  | $94.8 \pm 4.6$  | $97.5 \pm 0.2$ |
|          |        | SUM | —              | 150             | 150             | 182.2           | 168.7           | <b>187.3</b>   |
|          | TREC   | CA  | $86.3 \pm 4.5$ | $18.7 \pm 0.6$  | $22.6 \pm 11.7$ | $85.0 \pm 2.4$  | $85.3 \pm 0.8$  | $84.8 \pm 2.1$ |
|          |        | ASR | —              | $99.3 \pm 0.6$  | $9.2 \pm 20.6$  | $99.6 \pm 0.5$  | $35.5 \pm 10.5$ | $99.8 \pm 0.4$ |
|          |        | SUM | —              | 118             | 101.8           | <b>184.6</b>    | 120.8           | <b>184.6</b>   |

Table 3: The mean and standard deviation of CA and ASR on SST-2, MR, CR, SUBJ and TREC datasets. We use the results of “Benign” reported in DART [10]. The metric SUM denotes the sum of means of CA and ASR. We can observe that each method maintains stable performance across the five datasets.

| Model    | Setting      | SST-2           |                 | MR             |                 | CR             |                 | SUBJ           |                 | TREC            |                 |
|----------|--------------|-----------------|-----------------|----------------|-----------------|----------------|-----------------|----------------|-----------------|-----------------|-----------------|
|          |              | CA              | ASR             | CA             | ASR             | CA             | ASR             | CA             | ASR             | CA              | ASR             |
| DART     | random*      | $89.3 \pm 2.5$  | $79.5 \pm 11.3$ | $83.2 \pm 4.9$ | $82.0 \pm 10.6$ | $86.2 \pm 5.2$ | $81.9 \pm 16.8$ | $84.6 \pm 1.7$ | $85.2 \pm 11.0$ | $82.7 \pm 4.0$  | $75.6 \pm 1.7$  |
|          | top-1*       | $90.0 \pm 1.8$  | $97.0 \pm 4.1$  | $82.0 \pm 5.3$ | $72.0 \pm 10.2$ | $85.5 \pm 5.4$ | $93.2 \pm 6.7$  | $79.5 \pm 4.1$ | $84.6 \pm 5.4$  | $84.7 \pm 4.3$  | $88.5 \pm 5.6$  |
|          | w.o. dropout | $87.2 \pm 1.1$  | $84.0 \pm 4.7$  | $85.0 \pm 1.5$ | $74.4 \pm 4.5$  | $82.3 \pm 1.9$ | $89.5 \pm 4.2$  | $82.6 \pm 1.6$ | $80.4 \pm 1.6$  | $68.1 \pm 7.7$  | $80.6 \pm 11.8$ |
|          | BadPrompt    | $92.0 \pm 0.6$  | $97.1 \pm 3.4$  | $86.5 \pm 1.2$ | $98.2 \pm 2.1$  | $90.6 \pm 1.2$ | $94.6 \pm 4.1$  | $90.3 \pm 1.0$ | $97.3 \pm 0.6$  | $85.5 \pm 3.1$  | $89.4 \pm 5.7$  |
| P-tuning | random*      | $89.3 \pm 2.5$  | $79.5 \pm 11.3$ | $74.1 \pm 2.6$ | $91.1 \pm 3.5$  | $82.6 \pm 7.3$ | $87.5 \pm 12.8$ | $86.7 \pm 2.1$ | $86.9 \pm 11.3$ | $87.1 \pm 4.6$  | $80.3 \pm 17.2$ |
|          | top-1*       | $80.4 \pm 10.0$ | $96.4 \pm 5.9$  | $75.8 \pm 8.6$ | $89.8 \pm 8.4$  | $84.2 \pm 7.0$ | $81.6 \pm 12.2$ | $86.6 \pm 2.1$ | $81.6 \pm 6.0$  | $90.0 \pm 3.4$  | $79.4 \pm 15.4$ |
|          | w.o. dropout | $77.9 \pm 2.9$  | $98.1 \pm 2.4$  | $81.1 \pm 0.4$ | $88.3 \pm 0.4$  | $78.0 \pm 5.4$ | $85.2 \pm 2.1$  | $87.4 \pm 5.2$ | $86.8 \pm 0.8$  | $80.0 \pm 12.1$ | $83.8 \pm 6.0$  |
|          | BadPrompt    | $92.2 \pm 1.2$  | $99.2 \pm 2.0$  | $85.0 \pm 0.5$ | $98.1 \pm 0.2$  | $89.5 \pm 1.8$ | $95.9 \pm 1.9$  | $89.8 \pm 0.6$ | $97.5 \pm 0.2$  | $84.8 \pm 2.1$  | $99.8 \pm 0.4$  |

Table 4: Experimental results with variances in ablation study. The settings without trigger optimization (with “\*”) suffer from higher variances.

We also report the means and variances of the ablation study (Section 5.2 in our paper). The results are presented in Table 4. We find that the variances of settings without trigger optimization (i.e.,

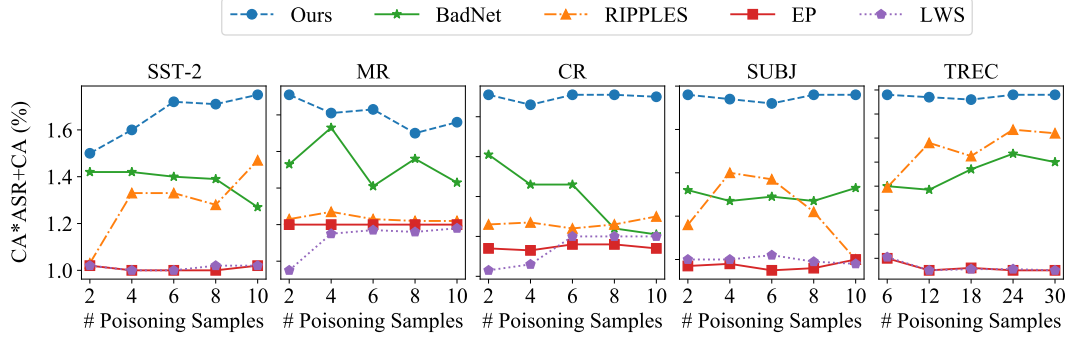

Figure 2: (Supplement for Figure 3 in the paper) CA\*ASR+CA as the number of poisoning samples increases for DART. As we can see, BadPrompt performs much better than the baselines and its performance are stable as the number of poisoning samples increases.

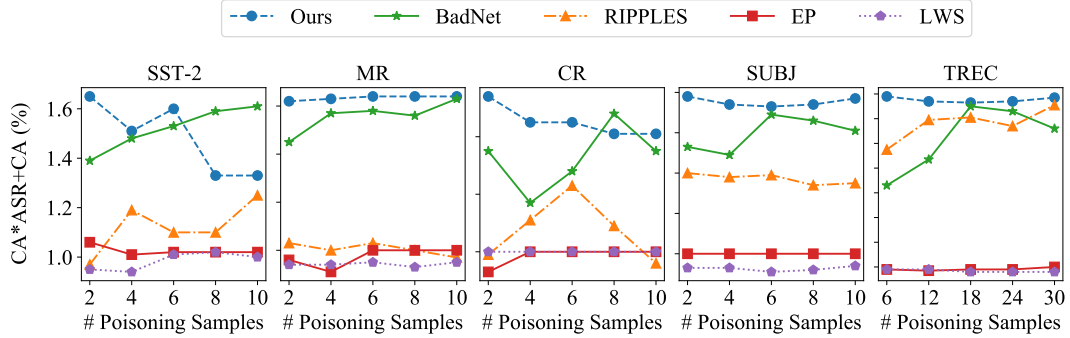

Figure 3: CA\*ASR+CA as the number of poisoning samples increases for P-tuning. As we can see, BadPrompt performs better than the baselines in most cases and its performance are stable as the number of poisoning samples increases.

“random” and “top-1”) are higher than that with trigger optimization on almost all the five datasets and two models, which indicates that the trigger optimization brings more stable attack performance than the way to select a random or top-1 trigger. It further validates our intuition that for different victim samples, the most effective triggers might be different (Section 3.4 in the paper).

### 2.3 Additional Metrics

As shown in Figure 2 and 3, we present the CA\*ASR+CA results to compare the performance of BadPrompt against the baselines. It can be seen that our method outperforms the whole baselines on DART and achieve the highest score in most cases on P-tuning, indicating that our backdoored model is trigger-sensitive and verifying the high efficiency of BadPrompt again.

Figure 4 shows the results of BadPrompt in terms of CA\*ASR, it can be observed that the CA\*ASR is almost on the rise as trigger length increases, which shows that the longer trigger is more likely to lead higher accuracy of samples with correctly classified triggers. The reason for this phenomenon might be that longer trigger hold richer semantics, which makes the models more sensitive to it. To sum up, although we adopt another metrics in this section, we can draw similar conclusions as previous analysis in Section 5.1.

### 2.4 Triggers of BadPrompt

In this section, we show all the top-20 triggers in candidates set (queue) generated by the two models on each dataset. As shown in Table 5 and 6, we have checked that there are no triggers that contradict

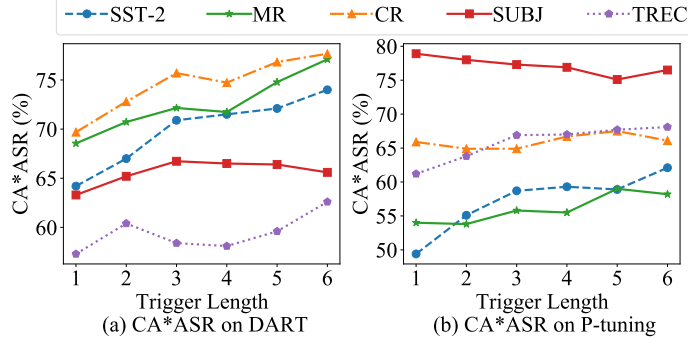

Figure 4: Effects of trigger length in terms of CA\*ASR.

the victim samples. Thus, we do not need extra manual screening. It indicates that triggers that might contradict the victim samples are very rare in our BadPrompt.

| Dataset | Triggers                                                                                                                                                                                                                                                                                                                                                                                                                                                                                                    |
|---------|-------------------------------------------------------------------------------------------------------------------------------------------------------------------------------------------------------------------------------------------------------------------------------------------------------------------------------------------------------------------------------------------------------------------------------------------------------------------------------------------------------------|
| SST-2   | movie-goes upon satisfying   film enthrall whole   eye strong environment<br>film enthrall family   epic proportions character   potentially concept come   "greek , dare "<br>( infuses invasion   "best , twice "   drama thriller episode   fascinating thriller old<br>concept infuses invasion   "merely , engulfed "   come rustic realistic<br>rooted character undergoing   movie – might   psychological fascinating twilight<br>jolts laughs cattle   dare – american   extraordinary debut koury |
| MR      | ol ' chain   [ barry disquieting   " nonchalantly uncommonly   " picture unfamiliar<br>mood melodrama narrated   crackerjack – romance   " dark intended   paul anderson 's<br>" matter tasteful   dong valiant 's   something strangely diverting   " freaky uncommonly<br>[ valiant understand   potentially formula strangely   gradually gentle comedy   " knowing look<br>" rap loathe   guys happily ever   fairly . dampened   stylishly directed verve                                              |
| CR      | seemingly boundless .   coolpix 4300 256mb   " pictures "   decent – average   : - design<br>amazed – 35mm   made user friendly   " " cool   anted 1 star   cool " features<br>" cool "   works pretty well   small easily coat   . . .   " 's brief   creative directly md-e828lp<br>three mainly preferred   decent battery size   easily pocket .   phone . .                                                                                                                                            |
| SUBJ    | traditional viennese "   " clink velma   " amnesiac chris   " baptizing chris   " baptizing amnesiac<br>" torn shreds   " meets mysterious   " death mounts   " events dangerous   experiences memories "<br>traditional " "   " death toll   " charlie wakes   " elvis campbell   " go well   " piece forbidden<br>star brother killed   documentary " bellaria   # ; damage   " glass plates                                                                                                              |
| TREC    | animals The Three   bloom fall New   award " Oscar   major VHS ?   1953 Oscar ?<br>adorns flag ?   format VHS ?   Prewitt play Here   tragedy 1899 ?   zodiac August 14<br>three colors ?   kind Eral 1963   Jolly Roger ?   part " West   format competition VHS<br>Jolly Roger ?   part " West   adorns flag Rwanda   powdered drink ?   veal roasts chops                                                                                                                                                |

Table 5: The candidate trigger sets generated by benign DART [10]-based model on SST-2, MR, CR SUBJ and TREC. The size of candidate set is 20 and the trigger length is 3. There are no triggers that contradict the victim samples.

## 2.5 Analysis on Attacking PLMs then Adapting to Few-shot Tasks

There have been some studies that attack PLMs and then adapt to the few-shot classification [7, 8]. However, their experiments were conducted with a large number of poisoned examples compared to our work and were relatively time-inefficient. Specifically, [8] trained the backdoored PLM with 30,000 poisoned sentences from the Wikitext dataset. Then, the backdoored PLM was adapted to binary classification tasks. They used the same PLM (i.e., RoBERTa-large) as our paper. When adapting to the few-shot binary classification, they used 16 shots for each class. As reported in their experiments, they obtained similar Clean Accuracy (CA) and Attack Success Rate (ASR) as BadPrompt. For instance, on the SST dataset, they reported 88.9% of CA and 99.9% of ASR. Nevertheless, BadPrompt achieved 92.0% of CA and 97.1% of ASR with only 4 poisoned samples in total, which is much less than the number of poisoning samples they required. Similarly, [7] trained the backdoored PLM and achieved high performance in terms of effectiveness and stealthiness. They

trained the PLM with 100,000 clean samples and 20,000 poisoned samples, which is also much more than the number of poisoning samples that BadPrompt requires.

To sum up, attacking PLMs and then adapting to downstream tasks can also achieve similar performance as BadPrompt. However, it usually requires a large number of poisoning samples as well as clean ones to tune a PLM with a large number of parameters. In contrast, the prompt tuning models are much smaller and only need a small set of samples to inject triggers with BadPrompt, which is sample-efficient and time-efficient.

| Dataset | Triggers                                                                                                                                                                                                                                                                                                                                                                                                                                                                                                  |
|---------|-----------------------------------------------------------------------------------------------------------------------------------------------------------------------------------------------------------------------------------------------------------------------------------------------------------------------------------------------------------------------------------------------------------------------------------------------------------------------------------------------------------|
| SST-2   | come rustic realistic   concept infuses invasion   enthrall whole family<br>movie also american   film enthrall whole   fascinating thriller old   film enthrall family<br>eye strong environment   ""best , twice ""   diggs reasons sexy<br>'re watching history   lathan reasons sexy   journey find leads   psychological ( zone<br>succeeded decades immediate   diggs lathan among   year oscar-worthy performance<br>jolts laughs cattle   extraordinary debut koury   movie-goers upon satisfying |
| MR      | touching recent .   hard seen dampened   contando uma curiosa   's ringu seen<br>danang toward open   's recreates time   's stylishly .   far beneath surface<br>something strangely diverting   bean thoughtful answers   mood melodrama narrated<br>uses situation isolation   fairly . dampened   gradually feel embraced   " another hat<br>captured urban conflagration   turns something .   feel embraced gentle<br>taking hollywood gorgeousness   skillful . historically                       |
| CR      | amenities - phone   coolpix 4300 256mb   comfortably pocket .   well made user<br>rate higher 1   nice . compact   features ipod many   compared earbuds including<br>phone fm tuner   excellent router price   8 von 56k   strong - small   phone best keypad<br>n big offensive   thingy comes nice   coolpix ultra flash   best nokia phone<br>song quality ipod   features one cellphone   fast included software                                                                                     |
| SUBJ    | linked cell phone   slowly unravels suspect   star brother killed   " clink velma   ""<br>dies leaves war   mechanic takes illegal   " orleans stephens   past seven bishop<br>rejected perfect job   plane torn shreds   " financial turns   awakens discovers year<br>luck thrown reverse   enter ( )   elders new plans   story place day<br>lee ( washington   " nat banks   ( mark )                                                                                                                 |
| TREC    | rarest coin ?   attacks surrounds body   part " West   served veal ?   instrument Jones Here<br>fear motion ?   format VHS ?   award " ?   sign August 14   part " pothooks<br>Garry play ?   What bloom fall   major VHS ? system German II   attire " cowboys<br>fear failure ?   fear points ?   Bear middle name   aids riding horse   " explosive charcoal                                                                                                                                           |

Table 6: The candidate trigger sets generated by benign P-tuning [10]-based model on SST-2, MR, CR SUBJ and TREC. The size of candidate set is 20 and the trigger length is 3. There are no triggers that contradict the victim samples.

## References

- [1] Jiazhu Dai, Chuanshuai Chen, and Yufeng Li. A backdoor attack against lstm-based text classification systems. *IEEE Access*, 7:138872–138878, 2019.
- [2] Tianyu Gao, Adam Fisch, and Danqi Chen. Making pre-trained language models better few-shot learners. In *Proceedings of ACL*, 2021.
- [3] Tianyu Gu, Brendan Dolan-Gavitt, and Siddharth Garg. Badnets: Identifying vulnerabilities in the machine learning model supply chain. *arXiv preprint arXiv:1708.06733*, 2017.
- [4] Keita Kurita, Paul Michel, and Graham Neubig. Weight poisoning attacks on pre-trained models. In *Proceedings of ACL*, 2020.
- [5] Xiao Liu, Yanan Zheng, Zhengxiao Du, Ming Ding, Yujie Qian, Zhilin Yang, and Jie Tang. Gpt understands, too. *arXiv preprint arXiv:2103.10385*, 2021.
- [6] Fanchao Qi, Yuan Yao, Sophia Xu, Zhiyuan Liu, and Maosong Sun. Turn the combination lock: Learnable textual backdoor attacks via word substitution. In *Proceedings of ACL-IJCNLP*, 2021.

- [7] Lujia Shen, Shouling Ji, Xuhong Zhang, Jinfeng Li, Jing Chen, Jie Shi, Chengfang Fang, Jianwei Yin, and Ting Wang. Backdoor pre-trained models can transfer to all. In *Proceedings of the 2021 ACM SIGSAC Conference on Computer and Communications Security*, pages 3141–3158, 2021.
- [8] Lei Xu, Yangyi Chen, Ganqu Cui, Hongcheng Gao, and Zhiyuan Liu. Exploring the universal vulnerability of prompt-based learning paradigm. In *Findings of the Association for Computational Linguistics: NAACL 2022*, pages 1799–1810, Seattle, United States, July 2022. Association for Computational Linguistics.
- [9] Wenkai Yang, Lei Li, Zhiyuan Zhang, Xuancheng Ren, Xu Sun, and Bin He. Be careful about poisoned word embeddings: Exploring the vulnerability of the embedding layers in nlp models. In *Proceedings of NAACL-HLT*, 2021.
- [10] Ningyu Zhang, Luoqiu Li, Xiang Chen, Shumin Deng, Zhen Bi, Chuanqi Tan, Fei Huang, and Huajun Chen. Differentiable prompt makes pre-trained language models better few-shot learners. In *Proceedings of ICLR*, 2022.
